# Supplementary material for: Severe or Profound Sensorineural Hearing Loss Caused by Novel USH2A Variants in Korea: Potential Genotype-Phenotype Correlation
Source: PubMed Central journal article supplement — Clin Exp Otorhinolaryngol. 2019 Nov 2;13(2):113–22. doi: 10.21053/ceo.2019.00990 (PMC7248602; doi:10.21053/ceo.2019.00990), 2019-11-02
Supplement: ceo-2019-00990-suppl1.pdf [file ceo-2019-00990-suppl1.pdf]

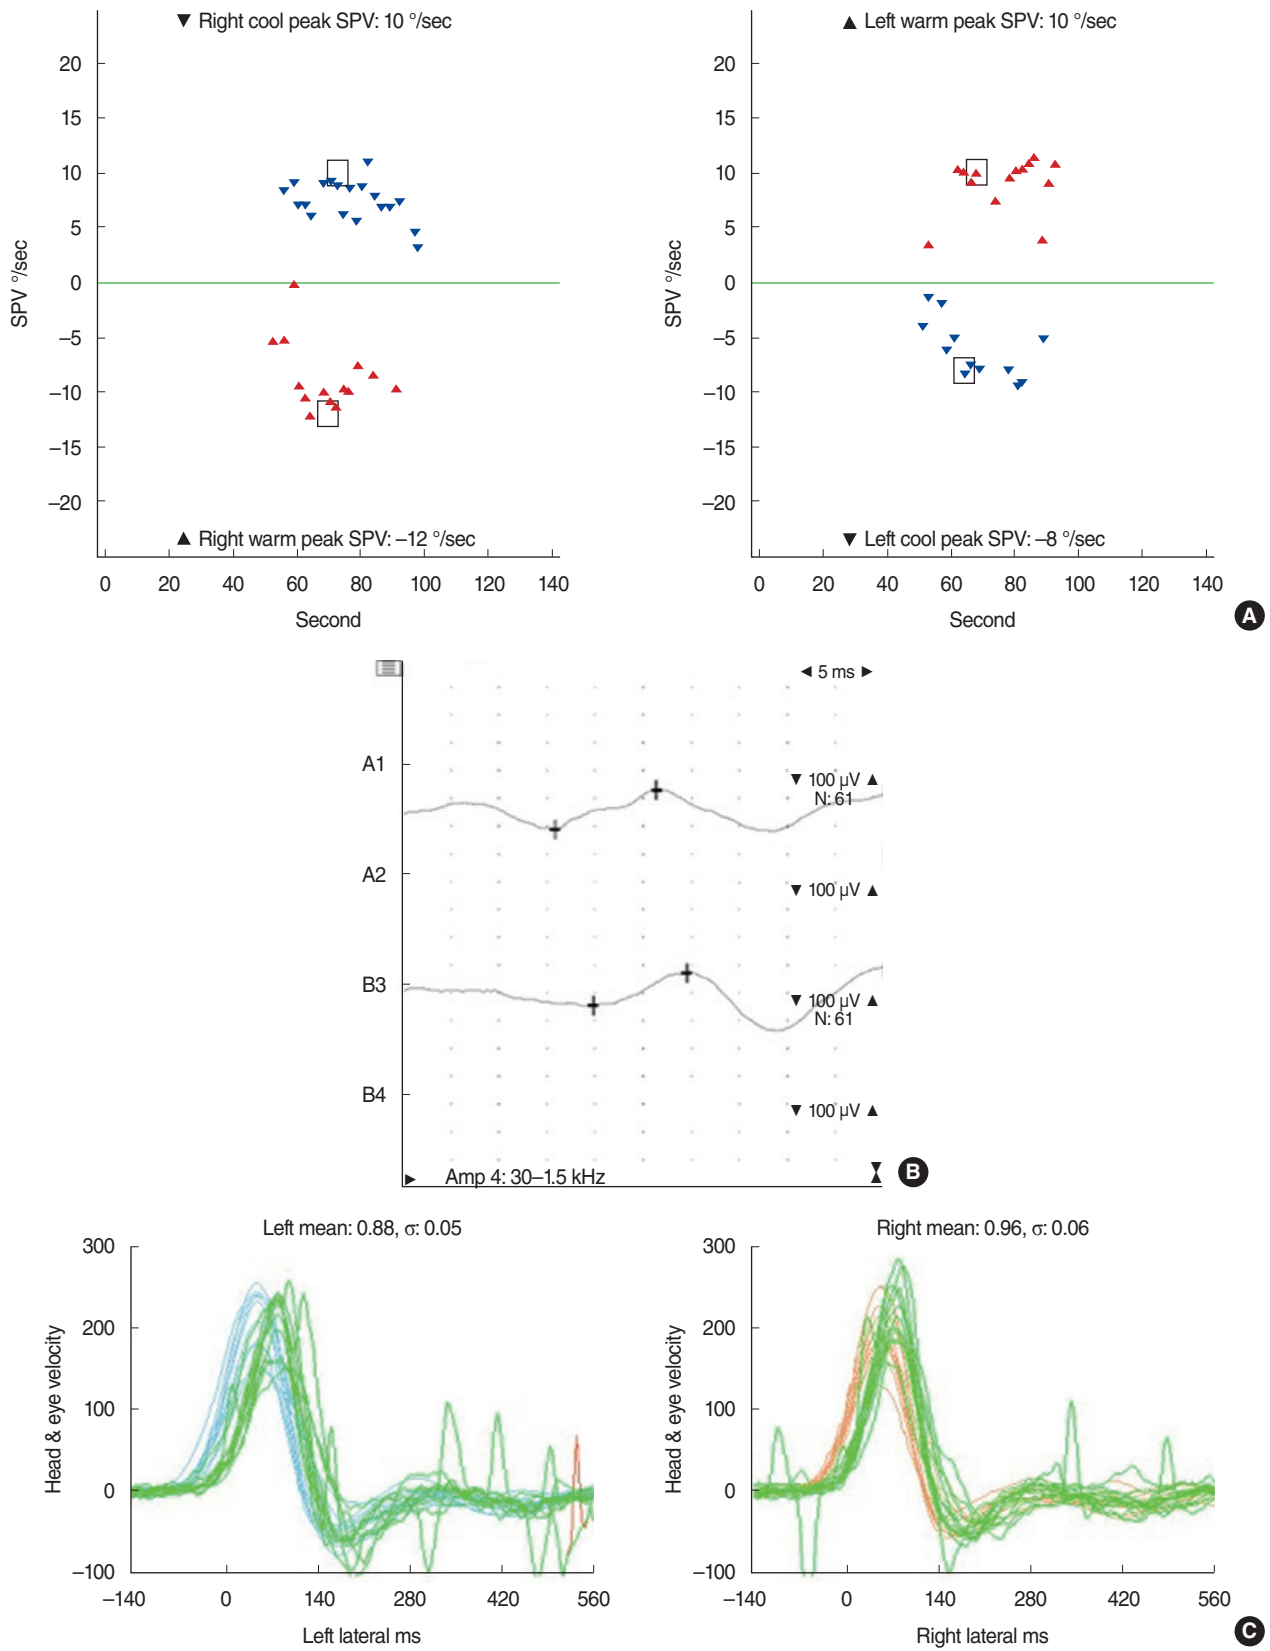

Supplementary Fig. 1. Comprehensive vestibular function test. (A) Bithermal caloric test. (B) Cervical vestibular-evoked myogenic potentials. (C) Video head impulse test. SPV, slow phase velocity.
