# Supplementary material for: Severe or Profound Sensorineural Hearing Loss Caused by Novel USH2A Variants in Korea: Potential Genotype-Phenotype Correlation
Source: PubMed Central journal article supplement — Clin Exp Otorhinolaryngol. 2019 Nov 2;13(2):113–22. doi: 10.21053/ceo.2019.00990 (PMC7248602; doi:10.21053/ceo.2019.00990), 2019-11-02
Supplement: ceo-2019-00990-suppl2.pdf [file ceo-2019-00990-suppl2.pdf]

Clinical and Experimental Otorhinolaryngology

|                                                 |                                                          |
|-------------------------------------------------|----------------------------------------------------------|
| <b>MLPA Analysis Report -</b>                   |                                                          |
| Software: GeneMarker V1.91                      | Analysis Type: MLPA                                      |
| Project: Untitled                               | Compare Type: MLPA Ratio                                 |
| Technician:                                     | Normalization By: Internal Control Probe Normalization   |
| Report Time: 07/04/2018 - 09:22:05              | Quantification By: Peak Height                           |
| Panel: P461-A1_DIS                              | Classification: Loss < 0.70 <= Equivalent <= 1.30 < Gain |
| Control: Synthetic Control Sample               | Report Value Type: Peak Ratio                            |
| Synthetic Used: SB254-502.fsa /// SB268-527.fsa |                                                          |

SB237-461.fsa

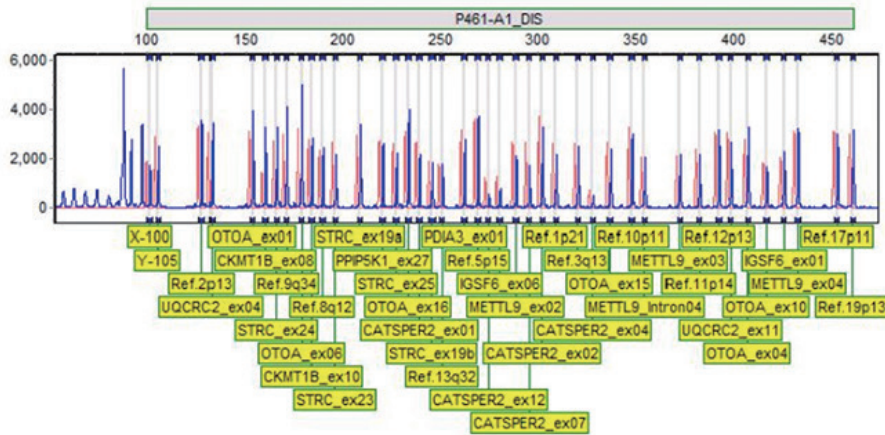

| Probe Name         | Bin Size | SB237-461 |
|--------------------|----------|-----------|
| 1 CATSPER2_ex01    | 239.2    | 0.806     |
| 2 CATSPER2_ex02    | 302.4    | 0.888     |
| 3 CATSPER2_ex04    | 328.3    | 0.653     |
| 4 CATSPER2_ex07    | 295.6    | 0.653     |
| 5 CATSPER2_ex12    | 274.7    | 0.449     |
| 6 CKMT1B_ex08      | 160.1    | 2.275     |
| 7 CKMT1B_ex10      | 184.0    | 1.032     |
| 8 IGSF6_ex01       | 425.8    | 1.116     |
| 9 IGSF6_ex06       | 280.6    | 0.596     |
| 10 METTL9_intron04 | 355.0    | 0.998     |
| 11 METTL9_ex02     | 288.8    | 0.791     |
| 12 METTL9_ex03     | 372.4    | 1.012     |
| 13 METTL9_ex04     | 432.9    | 1.046     |
| 14 OTOA_ex01       | 153.7    | 1.258     |
| 15 OTOA_ex04       | 407.3    | 1.182     |
| 16 OTOA_ex06       | 178.7    | 1.549     |
| 17 OTOA_ex10       | 416.8    | 0.858     |
| 18 OTOA_ex15       | 337.3    | 0.897     |
| 19 OTOA_ex16       | 233.7    | 1.287     |
| 20 PDIA3_ex01      | 282.4    | 0.873     |
| 21 PPIPSK1_ex27    | 220.3    | 0.951     |
| 22 Ref.10p11       | 348.5    | 0.915     |
| 23 Ref.11p14       | 382.3    | 0.893     |
| 24 Ref.12p13       | 392.3    | 1.040     |
| 25 Ref.13q32       | 251.0    | 1.005     |
| 26 Ref.17p11       | 453.1    | 0.964     |
| 27 Ref.19p13       | 461.2    | 1.056     |
| 28 Ref.1p21        | 309.4    | 0.833     |
| 29 Ref.2p13        | 128.0    | 1.073     |
| 30 Ref.3q13        | 320.7    | 0.957     |
| 31 Ref.5p15        | 269.3    | 1.032     |
| 32 Ref.8q12        | 189.6    | 1.029     |
| 33 Ref.9q34        | 171.1    | 1.363     |
| 34 STRC_ex19a      | 208.8    | 1.140     |
| 35 STRC_ex19b      | 245.8    | 0.972     |
| 36 STRC_ex23       | 196.2    | 0.808     |
| 37 STRC_ex24       | 166.1    | 1.216     |
| 38 STRC_ex25       | 227.4    | 0.864     |
| 39 UQCRC2_ex04     | 133.1    | 1.125     |
| 40 UQCRC2_ex11     | 398.5    | 0.884     |
| 41 X-100           | 101.4    | 0.928     |
| 42 Y-105           | 105.9    | 0.885     |

Sample Name: SB237-461  
 Machine: Macrogen3730XL19-20143-018  
 Run Time: 06/06/2018 - 03:23:50 -> 06/06/2018 - 04:07:19  
 Statistics # Probes Mean StdDev  
 Control/Sample 12/30 1.01/1.00 0.13/0.33

|                 |      |         |
|-----------------|------|---------|
| Conclusion      |      |         |
|                 | Date | Initial |
| Authorization 1 |      |         |
| Authorization 2 |      |         |

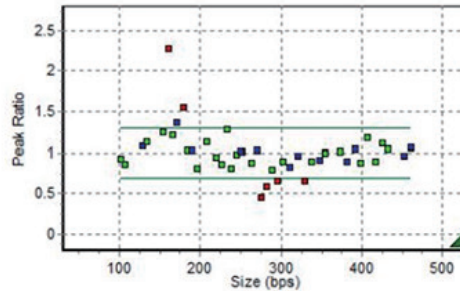

Supplementary Fig. 2. Multiplex ligation dependent probe amplification (MLPA) screening to identify *STRC* variants and large deletion in the *STRC* gene.
